# Supplementary material
Source: PubMed Central journal article supplement (PMC2441817)
Supplement: NIHMS1928-supplement-supp.pdf [file NIHMS1928-supplement-supp.pdf]

Figure 1.

*Susceptibility of transformed and wild type T. cruzi epimastigotes to  $\bullet$ NO and  $O_2^{\bullet-}$  fluxes.*

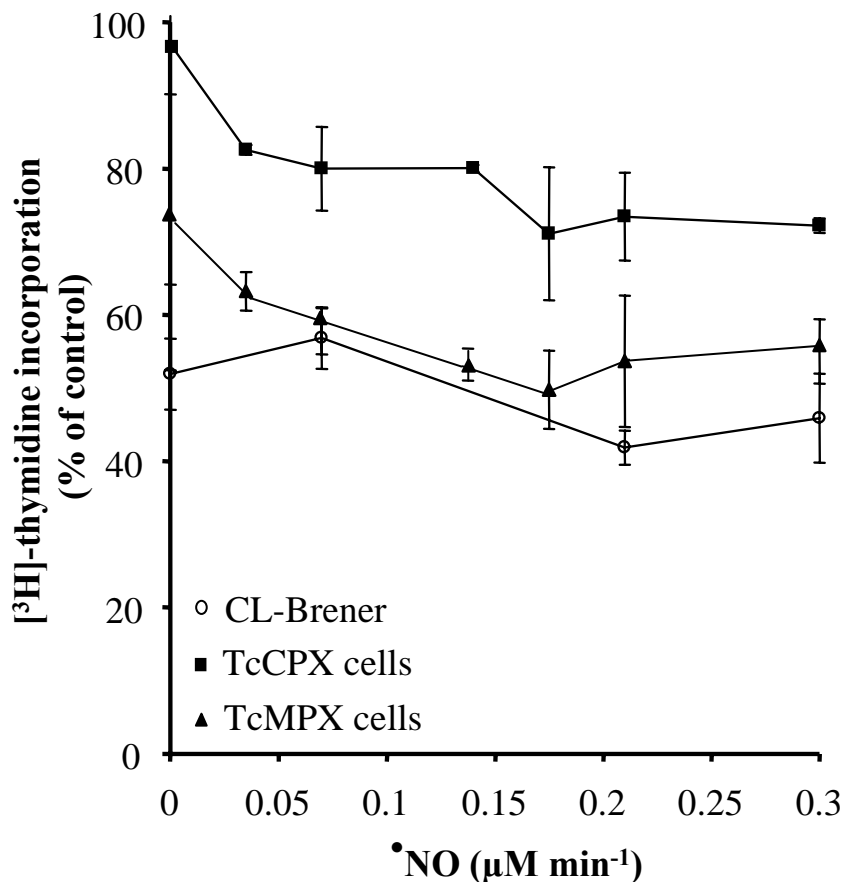

Parasites ( $3 \times 10^8$  cells  $\text{ml}^{-1}$ ) were treated with the redox cycling compound 2,3-dimethoxy-1-naphthoquinone (DMNQ, 50  $\mu\text{M}$ , 5 nM  $O_2^{\bullet-}/\text{min}/1 \times 10^8$  cells), estimated from  $\text{H}_2\text{O}_2$  formation by the *p*-hydroxy phenyl acetic acid-horseradish peroxidase assay [13, 20] in the presence or absence of different concentrations of NOC-18 (0-0.25  $\mu\text{M}$   $\bullet$ NO  $\text{min}^{-1}$ ). Results are expressed as % of [ $^3\text{H}$ ]-Thymidine incorporation with respect to non-treated cells (taken as 100%).
